# Supplementary material for: Emergency department crowding and mortality: an observational multicenter study in Sweden
Source: PubMed Central journal article supplement (PMC10407086; doi:10.3389/fpubh.2023.1198188), 2023-07-25
Supplement: Table_1.pdf [file Table_1.pdf]

**Table S1. Cox proportional hazard ratio for each crowding exposure and all cause mortality with 95% confidence interval and left truncation of data with <85 th percentile as reference**

|                | 1-day              | 7-day              | 30-day             |
|----------------|--------------------|--------------------|--------------------|
| mSEAL          |                    |                    |                    |
| 85-90%         | 1.02 (0.65 - 1.6)  | 0.94 (0.71 - 1.25) | 0.86 (0.69 - 1.06) |
| 90-95%         | 0.93 (0.77 - 1.13) | 0.98 (0.86 - 1.11) | 1.01 (0.92 - 1.11) |
| >95%           | 1.02 (0.89 - 1.17) | 1.03 (0.95 - 1.12) | 1 (0.94 - 1.07)    |
| Occupancy Rate |                    |                    |                    |
| 85-90%         | 0.95 (0.65 - 1.38) | 0.91 (0.7 - 1.17)  | 0.94 (0.79 - 1.14) |
| 90-95%         | 0.91 (0.72 - 1.15) | 0.92 (0.79 - 1.07) | 0.89 (0.8 - 1)     |
| >95%           | 1.03 (0.89 - 1.18) | 1.02 (0.93 - 1.11) | 1.03 (0.96 - 1.1)  |

**Table S2. 95th percentile value (85th percentile reference) for mSEAL at each hour and ED**

| mSEAL | Helsingborg | Linköping   | Lund        | Malmö       | Motala      | Norrköping  |
|-------|-------------|-------------|-------------|-------------|-------------|-------------|
| 0:00  | 4.67 (4.33) | 2.58 (2.38) | 4.82 (4.46) | 4.6 (4.34)  | 2.53 (2.27) | 2.48 (2.26) |
| 1:00  | 4.47 (4.07) | 2.22 (1.85) | 4.53 (4.21) | 4.5 (4.1)   | 2.02 (1.79) | 2 (1.8)     |
| 2:00  | 4.17 (3.85) | 2.44 (2.16) | 4.3 (3.93)  | 4.16 (3.9)  | 2.07 (1.94) | 2.17 (2.03) |
| 3:00  | 3.99 (3.64) | 2.51 (2.27) | 3.94 (3.71) | 3.89 (3.66) | 2.12 (1.98) | 2.29 (2.19) |
| 4:00  | 3.78 (3.42) | 2.6 (2.3)   | 3.79 (3.58) | 3.67 (3.41) | 2.17 (2.02) | 2.4 (2.22)  |
| 5:00  | 3.57 (3.26) | 2.57 (2.29) | 3.63 (3.4)  | 3.39 (3.2)  | 2.16 (2.01) | 2.46 (2.23) |
| 6:00  | 3.45 (3.12) | 2.42 (2.28) | 3.49 (3.29) | 3.23 (3.01) | 2.18 (2.02) | 2.4 (2.22)  |
| 7:00  | 3.33 (3.01) | 2.49 (2.22) | 3.41 (3.12) | 3.1 (2.88)  | 2.25 (2.04) | 2.4 (2.2)   |
| 8:00  | 3.4 (3.04)  | 2.58 (2.3)  | 3.37 (3.15) | 3.14 (2.9)  | 2.41 (2.22) | 2.48 (2.3)  |
| 9:00  | 3.63 (3.25) | 2.87 (2.62) | 3.61 (3.3)  | 3.22 (2.98) | 2.72 (2.55) | 2.75 (2.54) |
| 10:00 | 3.94 (3.53) | 3.28 (3.02) | 3.92 (3.62) | 3.26 (3.07) | 3.12 (2.89) | 3.09 (2.9)  |
| 11:00 | 4.31 (3.85) | 3.74 (3.53) | 4.27 (3.92) | 3.66 (3.45) | 3.8 (3.38)  | 3.53 (3.3)  |
| 12:00 | 4.6 (4.21)  | 4.26 (3.99) | 4.64 (4.25) | 4.02 (3.75) | 4.26 (3.86) | 3.86 (3.66) |
| 13:00 | 5.01 (4.57) | 4.68 (4.38) | 4.99 (4.65) | 4.46 (4.14) | 4.47 (4.22) | 4.33 (4.01) |
| 14:00 | 5.19 (4.77) | 5.2 (4.79)  | 5.24 (4.9)  | 4.71 (4.5)  | 4.86 (4.48) | 4.65 (4.36) |
| 15:00 | 5.15 (4.77) | 5.35 (4.93) | 5.41 (4.96) | 5.01 (4.56) | 5.05 (4.54) | 4.8 (4.47)  |
| 16:00 | 5.24 (4.8)  | 5.29 (4.98) | 5.5 (5)     | 5.11 (4.77) | 5.01 (4.53) | 4.84 (4.42) |
| 17:00 | 5.21 (4.79) | 5.35 (4.93) | 5.68 (5.06) | 5.2 (4.8)   | 4.92 (4.56) | 4.85 (4.39) |
| 18:00 | 5.2 (4.67)  | 5.36 (4.93) | 5.7 (5.14)  | 5.29 (4.86) | 4.74 (4.49) | 4.81 (4.4)  |
| 19:00 | 5.02 (4.59) | 5.17 (4.77) | 5.63 (5.13) | 5.2 (4.77)  | 4.59 (4.2)  | 4.69 (4.28) |
| 20:00 | 4.81 (4.5)  | 4.94 (4.51) | 5.54 (5.08) | 4.95 (4.7)  | 4.31 (3.96) | 4.38 (3.95) |
| 21:00 | 4.79 (4.41) | 4.5 (4.16)  | 5.34 (4.95) | 4.85 (4.59) | 4.15 (3.7)  | 4 (3.72)    |
| 22:00 | 4.78 (4.44) | 4.01 (3.74) | 5.08 (4.78) | 4.73 (4.45) | 3.71 (3.38) | 3.66 (3.4)  |
| 23:00 | 4.82 (4.45) | 3.32 (3.07) | 4.99 (4.64) | 4.82 (4.51) | 3.1 (2.91)  | 3.22 (2.93) |

**Table S3. 95th percentile value (85th percentile reference) for Occupancy at each hour of day and ED**

|       | Helsingborg | Linköping   | Lund        | Malmö       | Motala      | Norrköping  |
|-------|-------------|-------------|-------------|-------------|-------------|-------------|
| 0:00  | 1.54 (1.38) | 0.4 (0.31)  | 1.91 (1.71) | 1.01 (0.94) | 0.56 (0.48) | 0.62 (0.48) |
| 1:00  | 1.4 (1.23)  | 0.27 (0.19) | 1.71 (1.51) | 0.97 (0.86) | 0.37 (0.25) | 0.34 (0.28) |
| 2:00  | 1.23 (1.11) | 0.25 (0.19) | 1.54 (1.37) | 0.83 (0.76) | 0.25 (0.19) | 0.34 (0.24) |
| 3:00  | 1.1 (1)     | 0.31 (0.21) | 1.29 (1.2)  | 0.74 (0.68) | 0.31 (0.25) | 0.38 (0.31) |
| 4:00  | 1.02 (0.9)  | 0.31 (0.21) | 1.23 (1.06) | 0.67 (0.6)  | 0.31 (0.25) | 0.41 (0.34) |
| 5:00  | 0.94 (0.81) | 0.29 (0.23) | 1.08 (0.97) | 0.56 (0.5)  | 0.31 (0.25) | 0.48 (0.34) |
| 6:00  | 0.87 (0.75) | 0.25 (0.21) | 0.97 (0.86) | 0.5 (0.44)  | 0.31 (0.25) | 0.41 (0.34) |
| 7:00  | 0.87 (0.71) | 0.25 (0.21) | 0.94 (0.83) | 0.48 (0.41) | 0.31 (0.25) | 0.41 (0.31) |
| 8:00  | 0.9 (0.75)  | 0.29 (0.25) | 1 (0.86)    | 0.46 (0.39) | 0.44 (0.38) | 0.48 (0.38) |
| 9:00  | 1.04 (0.88) | 0.4 (0.33)  | 1.2 (1.05)  | 0.5 (0.44)  | 0.63 (0.56) | 0.59 (0.52) |
| 10:00 | 1.29 (1.07) | 0.52 (0.46) | 1.48 (1.31) | 0.63 (0.57) | 0.88 (0.81) | 0.86 (0.72) |
| 11:00 | 1.48 (1.27) | 0.65 (0.6)  | 1.77 (1.6)  | 0.79 (0.69) | 1.25 (1.06) | 1.1 (0.97)  |
| 12:00 | 1.63 (1.48) | 0.81 (0.75) | 2.03 (1.8)  | 0.91 (0.82) | 1.44 (1.25) | 1.34 (1.17) |
| 13:00 | 1.79 (1.62) | 0.96 (0.85) | 2.17 (1.97) | 1.05 (0.93) | 1.56 (1.43) | 1.48 (1.34) |
| 14:00 | 1.86 (1.69) | 1.06 (0.92) | 2.31 (2.14) | 1.11 (1.03) | 1.69 (1.44) | 1.62 (1.48) |
| 15:00 | 1.94 (1.69) | 1.1 (1)     | 2.43 (2.22) | 1.21 (1.08) | 1.81 (1.56) | 1.66 (1.55) |
| 16:00 | 1.96 (1.71) | 1.1 (1)     | 2.51 (2.22) | 1.22 (1.1)  | 1.75 (1.5)  | 1.72 (1.55) |
| 17:00 | 1.9 (1.75)  | 1.13 (1)    | 2.6 (2.25)  | 1.25 (1.14) | 1.81 (1.62) | 1.72 (1.52) |
| 18:00 | 1.88 (1.67) | 1.08 (0.98) | 2.63 (2.22) | 1.29 (1.14) | 1.69 (1.56) | 1.65 (1.48) |
| 19:00 | 1.85 (1.63) | 1.04 (0.96) | 2.57 (2.29) | 1.22 (1.13) | 1.56 (1.38) | 1.65 (1.41) |
| 20:00 | 1.73 (1.57) | 0.96 (0.88) | 2.48 (2.22) | 1.19 (1.1)  | 1.5 (1.3)   | 1.45 (1.31) |
| 21:00 | 1.67 (1.52) | 0.85 (0.77) | 2.28 (2.11) | 1.15 (1.07) | 1.38 (1.18) | 1.28 (1.17) |
| 22:00 | 1.67 (1.48) | 0.73 (0.65) | 2.14 (1.97) | 1.08 (1.03) | 1.13 (0.94) | 1.17 (0.99) |
| 23:00 | 1.61 (1.44) | 0.58 (0.5)  | 2.08 (1.88) | 1.08 (1.01) | 0.94 (0.81) | 0.93 (0.76) |
